# Supplementary material for: Distinguishing between Microbial Habitats Unravels Ecological Complexity in Coral Microbiomes
Source: PubMed Central journal article supplement (PMC5080407; doi:10.1128/msystems.00143-16), 2016-10-25
Supplement: sys001162060sf6.pdf [file sys001162060sf6.pdf]

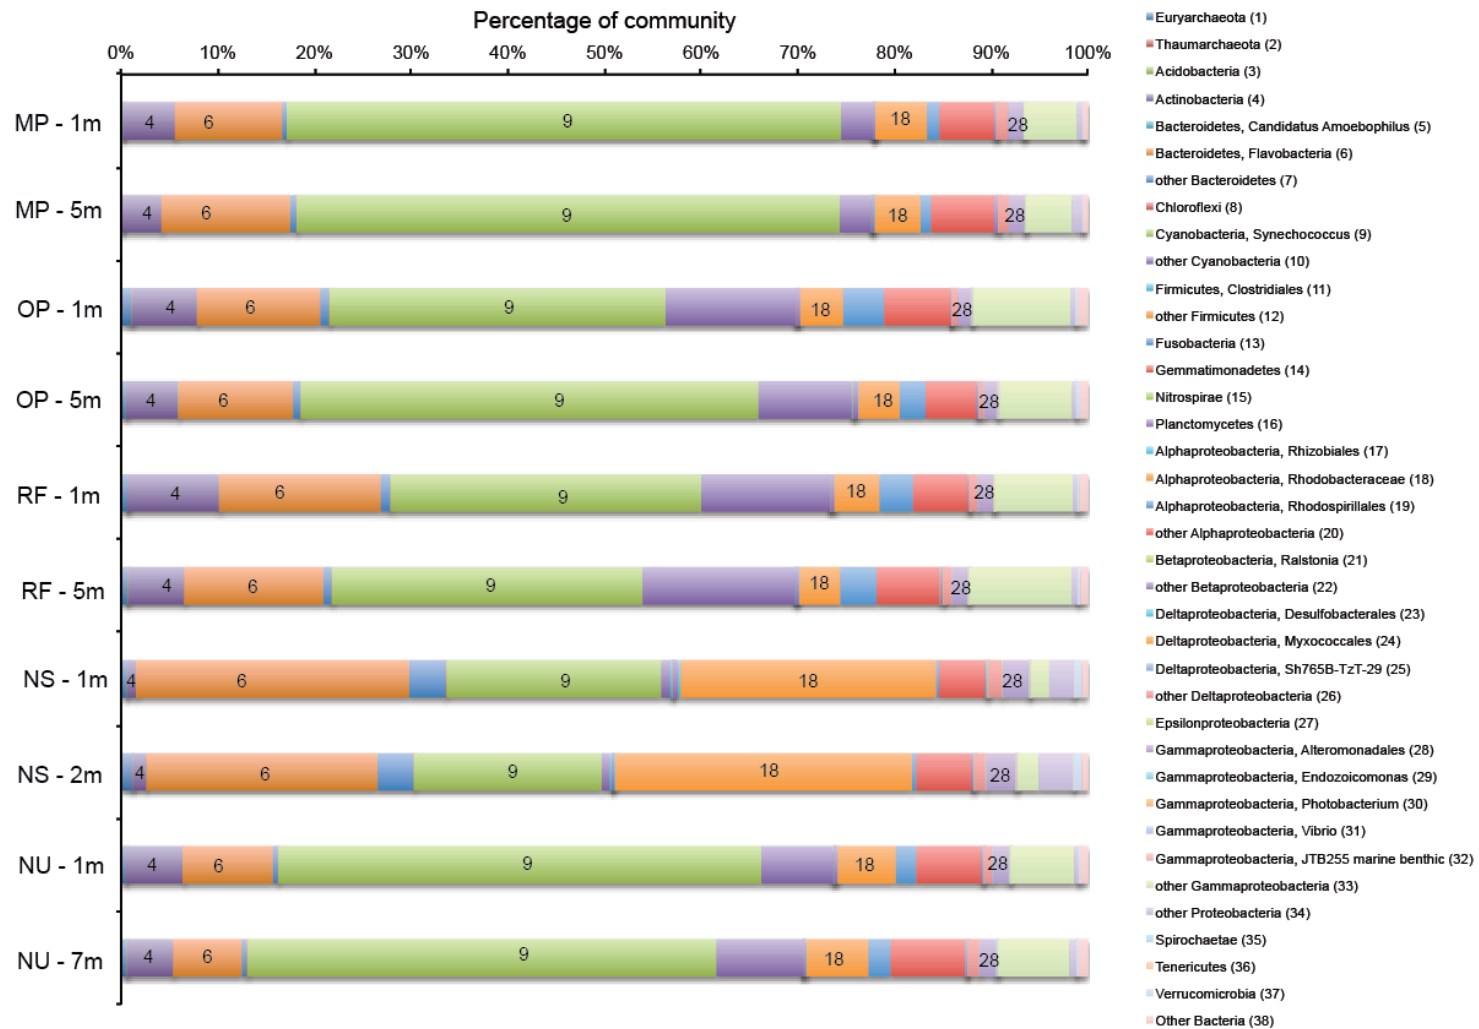

Figure S6. Percentage of major taxonomic groups of archaea and bacteria recovered from seawater. A number corresponding to taxonomic affiliation is listed for select groups that are consistently associated with a habitat.
